# Supplementary material
Source: publisher figshare collection journal article supplement (https://aacr.figshare.com/articles/dataset/_/22692355)
Supplement: Supplementary file 1 [file 40287478]

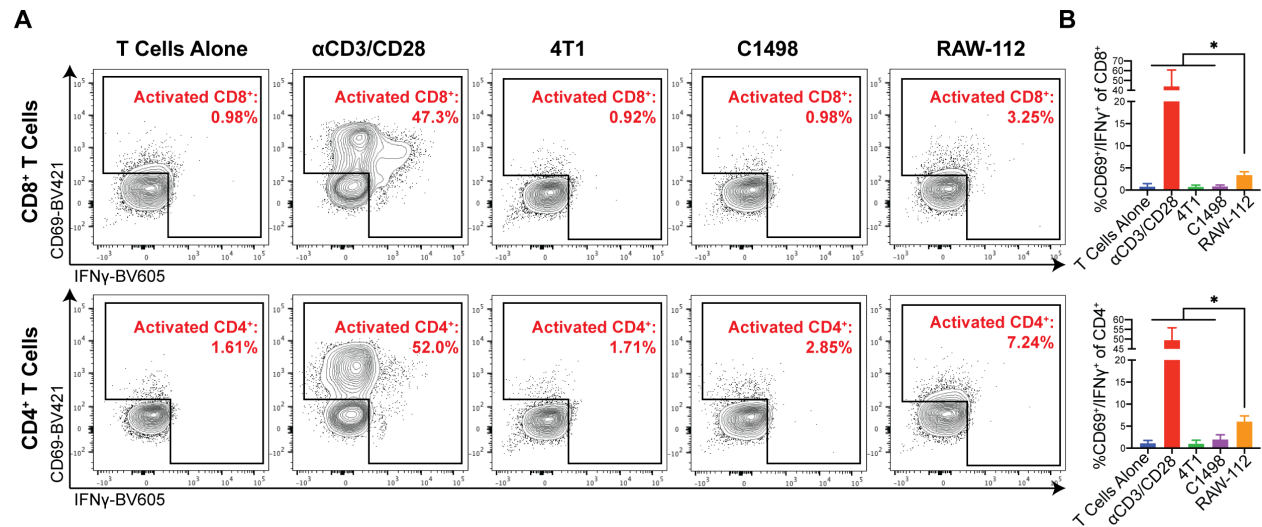

**Supplemental Figure S4: In vitro re-exposure of T cells from surviving mice demonstrates TR-APC-mediated generation of tumor-specific memory. A-B,** Representative flow cytometric analysis of T cell activation by FACS isolated T cells from surviving mice from **Figure 3B** following in vitro co-culture with indicated tumor cell line for 24 hours. Rapid secondary activation and IFN $\gamma$  production are displayed, as these markers are indicative of tumor-specific memory. **B,** Data displayed as mean  $\pm$  S.D. n=4 mice/group. *P* values were calculated using RM one-way ANOVA with Dunnett's multiple comparison test, \**P*<sub>adj</sub>  $\leq$  0.05.
